# Supplementary material for: Bacterial associates of seed-parasitic wasps (Hymenoptera: Megastigmus)
Source: PubMed Central journal article supplement (PMC4197294; doi:10.1186/s12866-014-0224-4), 2014-09-25
Supplement: 12866_2014_224_MOESM1_ESM.pdf [file 12866_2014_224_MOESM1_ESM.pdf]

Summary of 454 16S rRNA sequence data

---

***454 Sequence summary***

---

|                                   |               |
|-----------------------------------|---------------|
| Number of raw input reads:        | 81,207        |
| Raw length min/max/avg:           | 100/633/422.3 |
| Number of filtered reads:         | 60,543        |
| Filtered length min/max/avg:      | 72/605/394.3  |
| Number of chimeric sequences:     | 1,190         |
| Number of singletons:             | 183           |
| Number of unclassified sequences: | 4,932         |

---

***OTU Assignments***

---

|                                    |     |
|------------------------------------|-----|
| Number of OTUs assigned to kingdom | 352 |
| Number of OTUS assigned to phylum  | 255 |
| Number of OTUS assigned to class   | 248 |
| Number of OTUS assigned to order   | 233 |
| Number of OTUs assigned to family  | 217 |
| Number of OTUs assigned to genus   | 160 |

---

***Seqs/sample summary***

---

|                     |       |
|---------------------|-------|
| Number of Samples:  | 15    |
| Min:                | 1,962 |
| Max:                | 6,130 |
| Median:             | 2,974 |
| Mean:               | 3,616 |
| Standard Deviation: | 1,415 |

---
