# Supplementary material for: Bacterial associates of seed-parasitic wasps (Hymenoptera: Megastigmus)
Source: PubMed Central journal article supplement (PMC4197294; doi:10.1186/s12866-014-0224-4), 2014-09-25

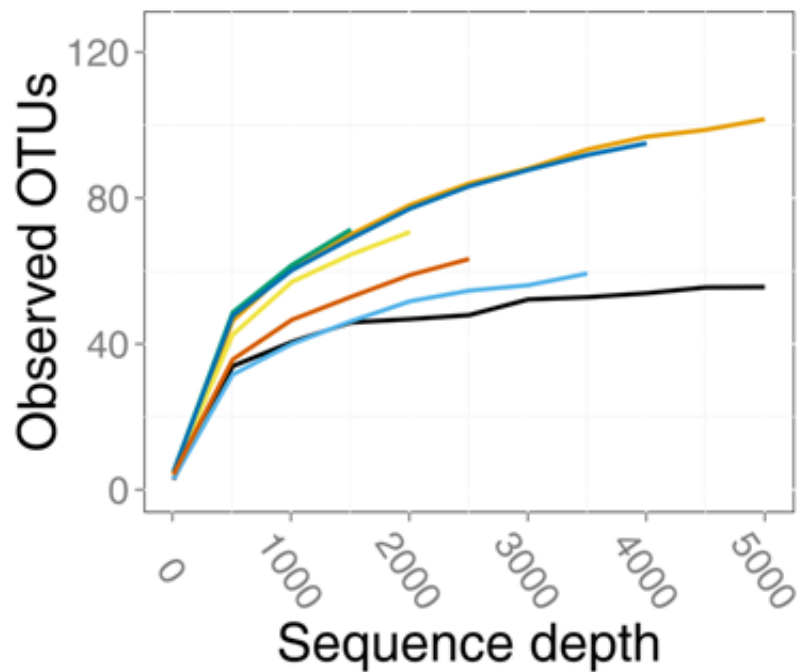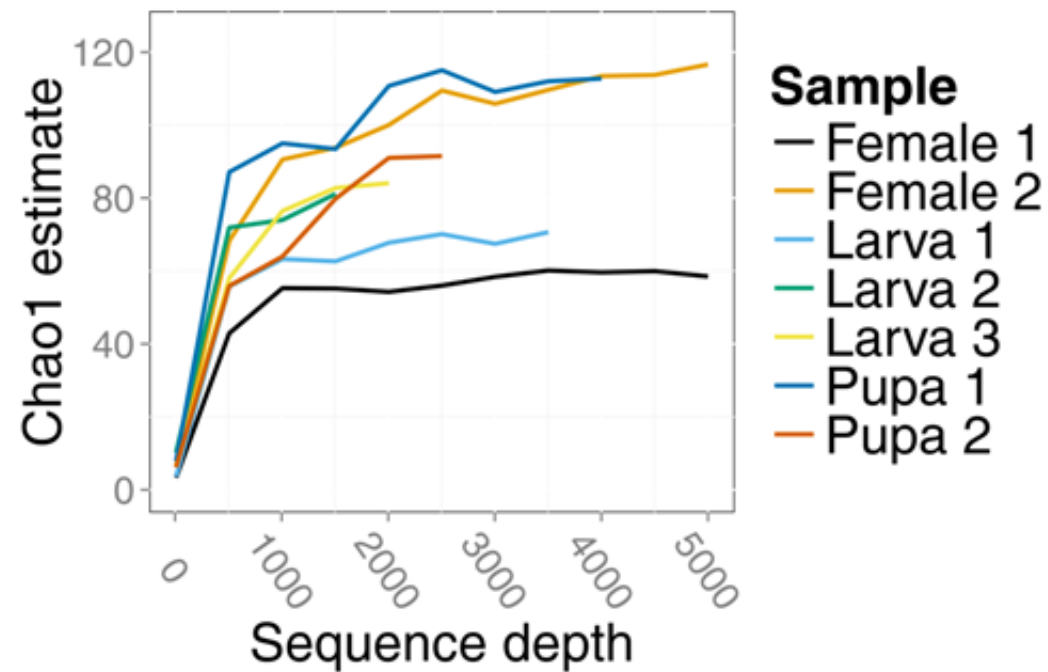

Supplement: 12866_2014_224_MOESM2_ESM.pdf [file 12866_2014_224_MOESM2_ESM.pdf]
