# Supplementary material for: Bacterial associates of seed-parasitic wasps (Hymenoptera: Megastigmus)
Source: PubMed Central journal article supplement (PMC4197294; doi:10.1186/s12866-014-0224-4), 2014-09-25
Supplement: 12866_2014_224_MOESM5_ESM.pdf [file 12866_2014_224_MOESM5_ESM.pdf]

List of PCR primers and reaction conditions

| Target                                        | Target gene | Primer name        | Primer sequence (5'-3')                                  | Product size (bp) | Temperature Profile                                         | Refs.* |
|-----------------------------------------------|-------------|--------------------|----------------------------------------------------------|-------------------|-------------------------------------------------------------|--------|
| Invertebrates                                 | COI         | LCO1490<br>HCO     | GGTCAACAAATCATAAAGATATTGG<br>TAAACTTCAGGGTGACCAAAAAATCA  | 600               | 95°C 3:00; 35x(94°C 1:00, 54°C 1:00, 72°C 1:30); 72°C 10:00 | 1      |
| <i>Megastigmus</i> spp.                       | COI         | Ana<br>Will        | TCCAAAAATTGCAAATACAGC<br>TTCCTGATATAGCATTTCCTCG          | 900               | 95°C 3:00; 35x(94°C 1:00, 54°C 1:00, 72°C 1:30); 72°C 10:00 | 2      |
| <i>Arsenophonus</i>                           | 16S         | ArSF<br>ArSR3      | GGGTTGTAAAGTACTTTCAGTCGT<br>CCTYTATCTCTAAAGGMTTCGCTGGATG | 580-800           | 95°C 2:00; 35x(94°C 0:30, 52°C 0:30, 72°C 1:30); 72°C 5:00  | 3      |
| <i>Cardinium</i>                              | 16S         | CLOf<br>CLOr1      | GCGGTGTAAAATGAGCGTG<br>ACCTMTTCTTAACTCAAGCCT             | 450               | 94°C 4:00; 35x(94°C 0:40, 57°C 0:40, 72°C 0:45); 72°C 5:00  | 4      |
| <i>Rickettsia</i>                             | gltA        | Rp877p<br>Rp1258n  | GGGGACCTGCTCACGGCGG<br>ATTGCAAAAAGTACAGTGAACA            | 381               | 95°C 3:00; 35x(95°C 0:20, 48°C 0:30, 60°C 2:00); 72°C 10:00 | 5      |
| <i>Rickettsia</i>                             | 16S         | RSSUf<br>RSSUr     | GCTTTCAAAACCTACTAATCTA<br>AAAAGCATCTCTGCGATCCG           | 380               | 95°C 3:00; 35x(95°C 0:60, 51°C 0:45, 72°C 1:00); 72°C 5:00  | 6      |
| <i>Spiroplasma poulsonii, kunkelii, citri</i> | p58         | p58-f<br>p58-r     | GTTGGTTGAATAATATCTGTTG<br>GATGGTGCTAAATTATATTGAC         | 793               | 95°C 3:00; 35x(94°C 1:00, 54°C 1:00, 72°C 1:30); 72°C 10:00 | 7      |
| <i>Spiroplasma ixodetis</i>                   | 16S         | Spixof<br>Spixor   | TTAGGGGCTCAACCCCTAACC<br>TCTGGCATTGCCAACTCTC             | 810               | 95°C 2:00; 35X (94°C 0:30, 52°C 0:30, 72°C 1:30); 72°C 5:00 | 3      |
| <i>Wolbachia</i>                              | coxA        | coxA_F1<br>coxA_R1 | TTGGRGCRATYAACTTTATAG<br>CTAAAGACTTTKACRCCAGT            | 402               | 94°C 2:00; 36x(94°C 0:30, 59°C 0:30, 72°C 1:30); 70°C 10:00 | 8      |
| <i>Wolbachia</i>                              | ftsZ        | ftsZ_F1<br>ftsZ_R1 | ATYATGGARCATATAAARGATAG<br>TCRAGYAATGGATTRGATAT          | 1200              | 94°C 3:00; 35x(94°C 0:30, 54°C 0:45, 70°C 1:30); 70°C 10:00 | 8      |
| <i>Wolbachia</i>                              | gatB        | gatB_F1<br>gatB_R1 | GAKTTAAAYCGYGCAGGBGTT<br>TGGYAAAYTCRGGYAAAGATGA          | 369               | 94°C 2:00; 36x(94°C 0:30, 55°C 0:30, 72°C 1:30); 70°C 10:00 | 8      |

- \* 1. Folmer O, Black M, Hoeh W, Lut R, Vrijenhoek R: **DNA primers for amplification of mitochondrial cytochrome c oxidase subunit I from diverse metazoan invertebrates.** *Mol Mar Biol Biotechnol* 1994, **3**: 294-299.
2. Marie-Anne Auger-Rozenberg, unpublished.
3. Duron O, Bouchon D, Boutin S, Bellamy L, Zhou L, Engelstädter J, Hurst GD: **The diversity of reproductive parasites among arthropods: *Wolbachia* do not walk alone.** *BMC Biol* 2008, **6**:27.
4. Weeks AR, Velten R, Stouthamer R: **Incidence of a new sex-ratio-distorting endosymbiotic bacterium among arthropods.** *Proc R Soc London B Biol Sci* 2003, **270**:1857–1865.
5. Regnery RL, Spruill CL, Plikaytis BD: **Genotypic identification of rickettsiae and estimation of intraspecies sequence divergence for portions of two rickettsial genes.** *J Bacteriol* 1991, **173**:1576–1589.
6. Von der Schulenburg JHG, Habig M, Sloggett JJ, Webberley KM, Bertrand D, Hurst GDD, Majerus MEN: **Incidence of male-killing *Rickettsia* spp. (alpha-Proteobacteria) in the Ten-Spot Ladybird Beetle *Adalia decempunctata* L. (Coleoptera: Coccinellidae).** *Appl Environ Microbiol* 2001, **67**:270–277.
7. Montenegro H, Solferini VN, Klaczko LB, Hurst GDD: **Male-killing *Spiroplasma* naturally infecting *Drosophila melanogaster*.** *Insect Mol Biol* 2005, **14**:281–287.
8. Baldo L, Dunning Hotopp JC, Jolley KA, Bordenstein SR, Biber SA, Choudhury RR, Hayashi C, Maiden MCJ, Tettelin H, Werren JH: **Multilocus sequence typing system for the endosymbiont *Wolbachia pipientis*.** *Appl Environ Microbiol* 2006, **72**:7098–7110.
